# Supplementary material
Source: publisher site journal article supplement (https://www.dovepress.com/get_supplementary_file.php?f=306602.docx)
Supplement: Supplementary file 1 [file get_supplementary_file.php]

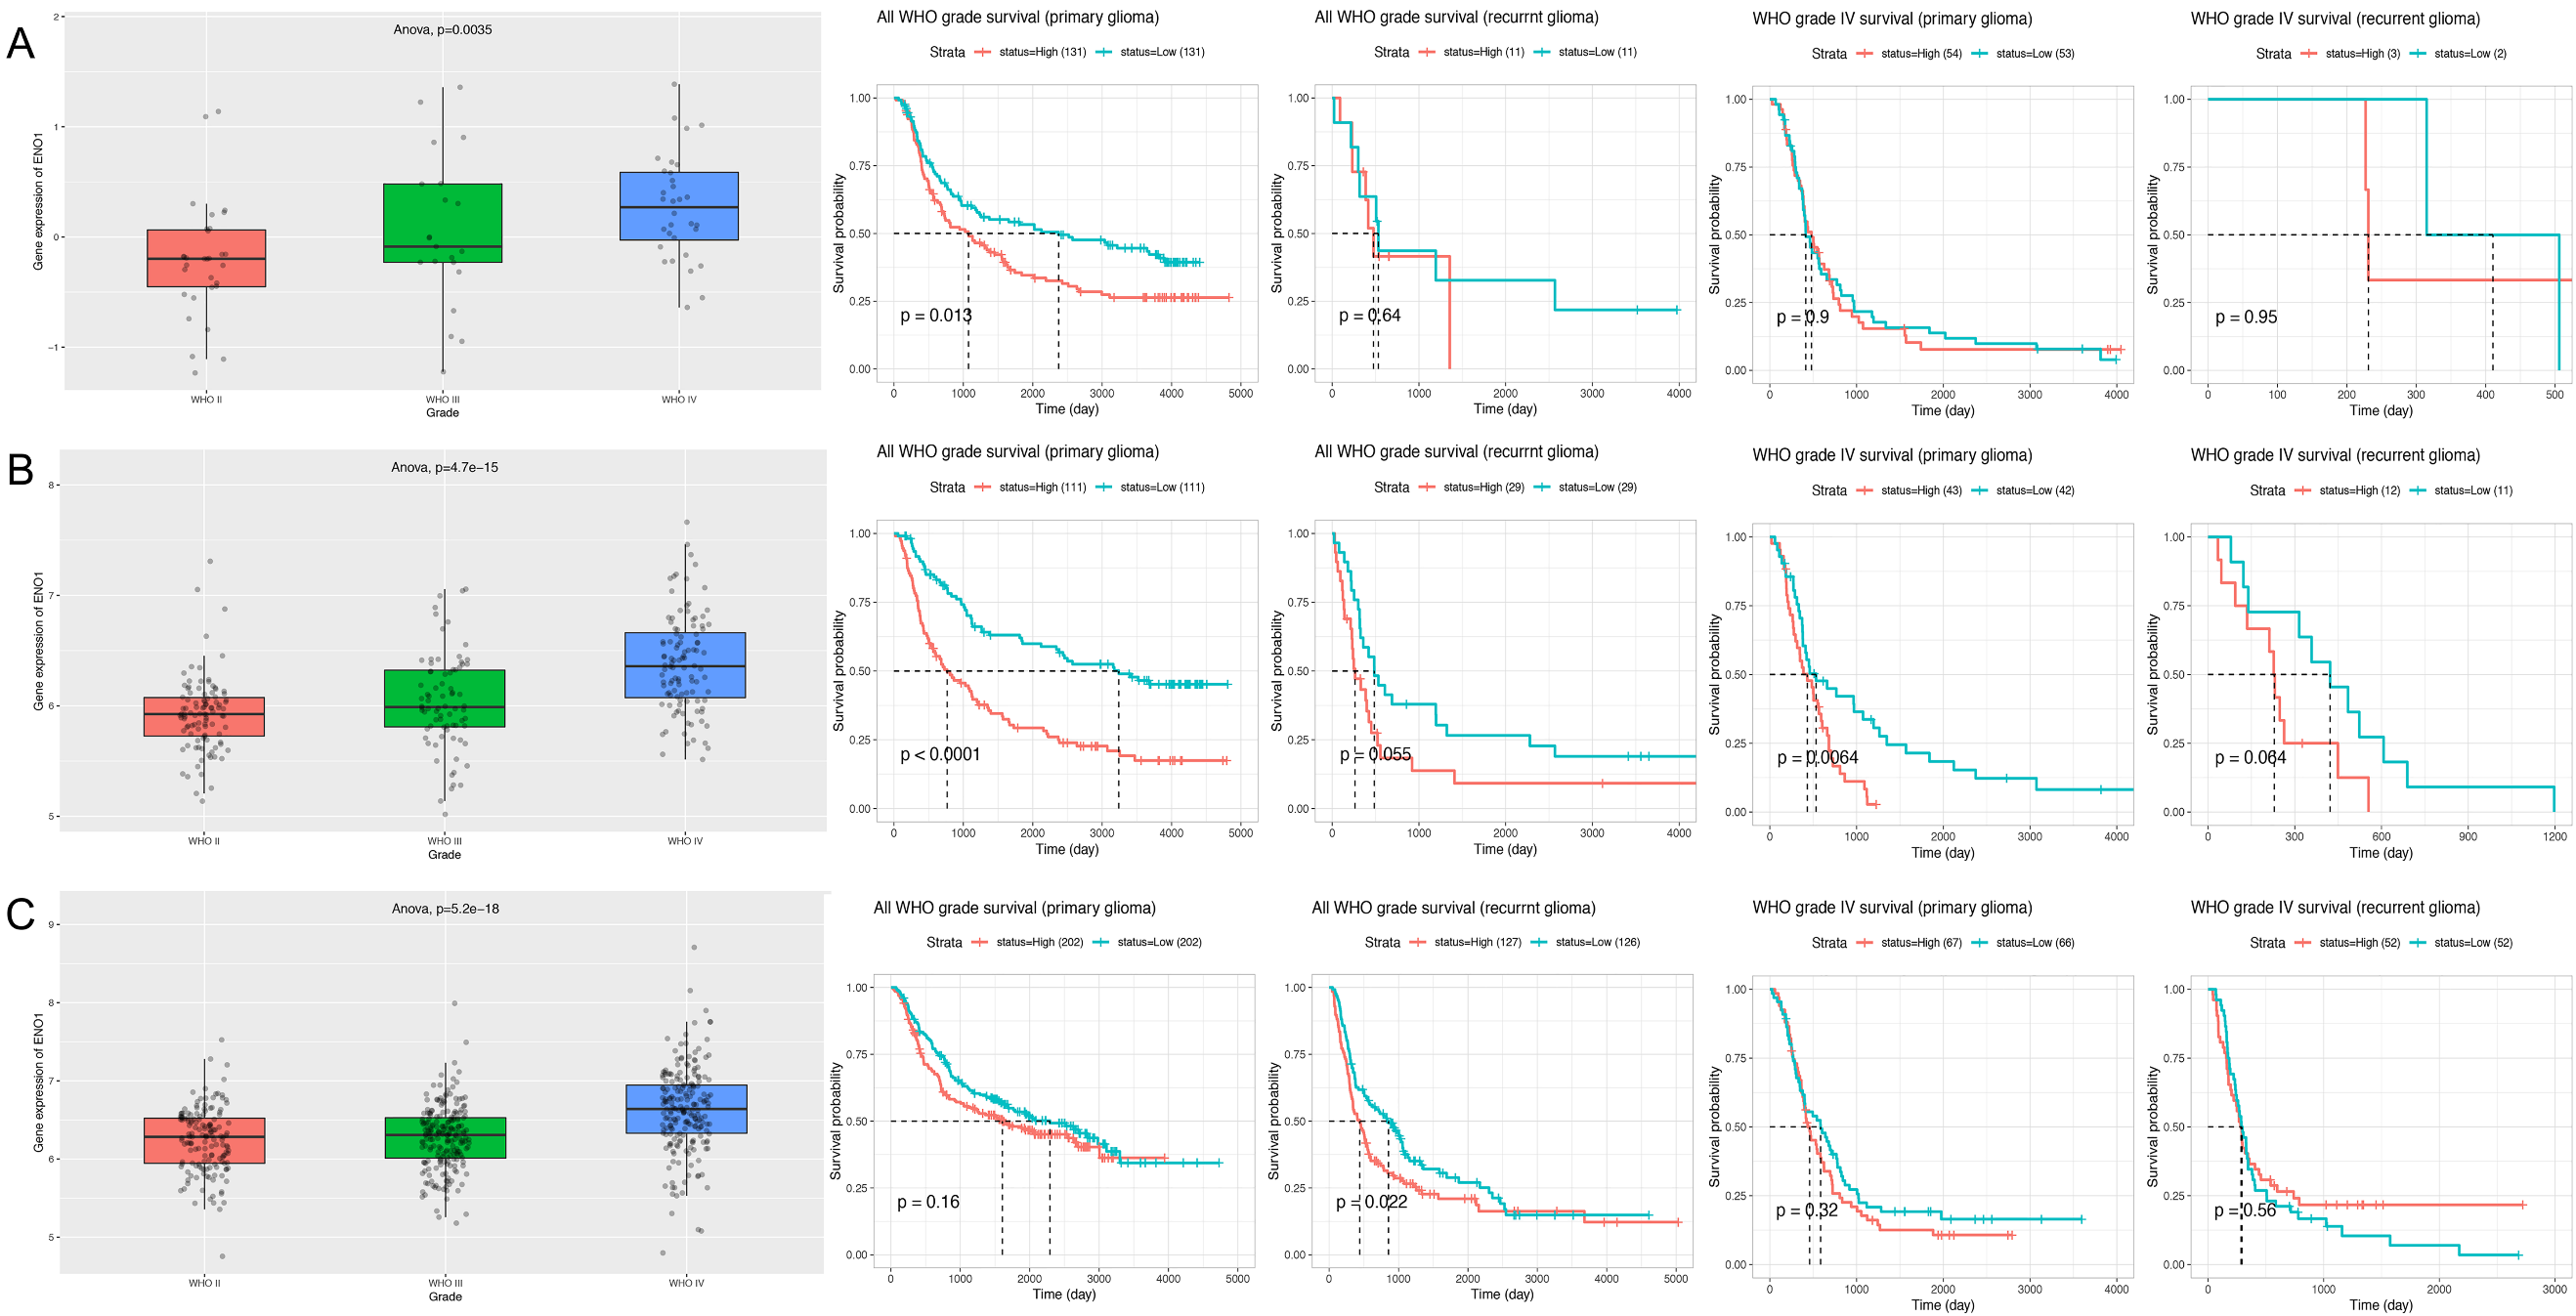
**SUPPLEMENTARY FIGURE**

Figure S1. The expression and survival analysis of *ENO1* verified by the CGGA database. The expression and survival analysis obtained from (A) mRNA-array_301, (B) mRNA-seq_325 and (C) mRNA-seq_693 datasets.
